# Supplementary material
Source: MDPI journal article supplement (https://www.mdpi.com/2072-4292/13/23/4947)
Supplement: s1 [file s1]

## Supplementary Materials

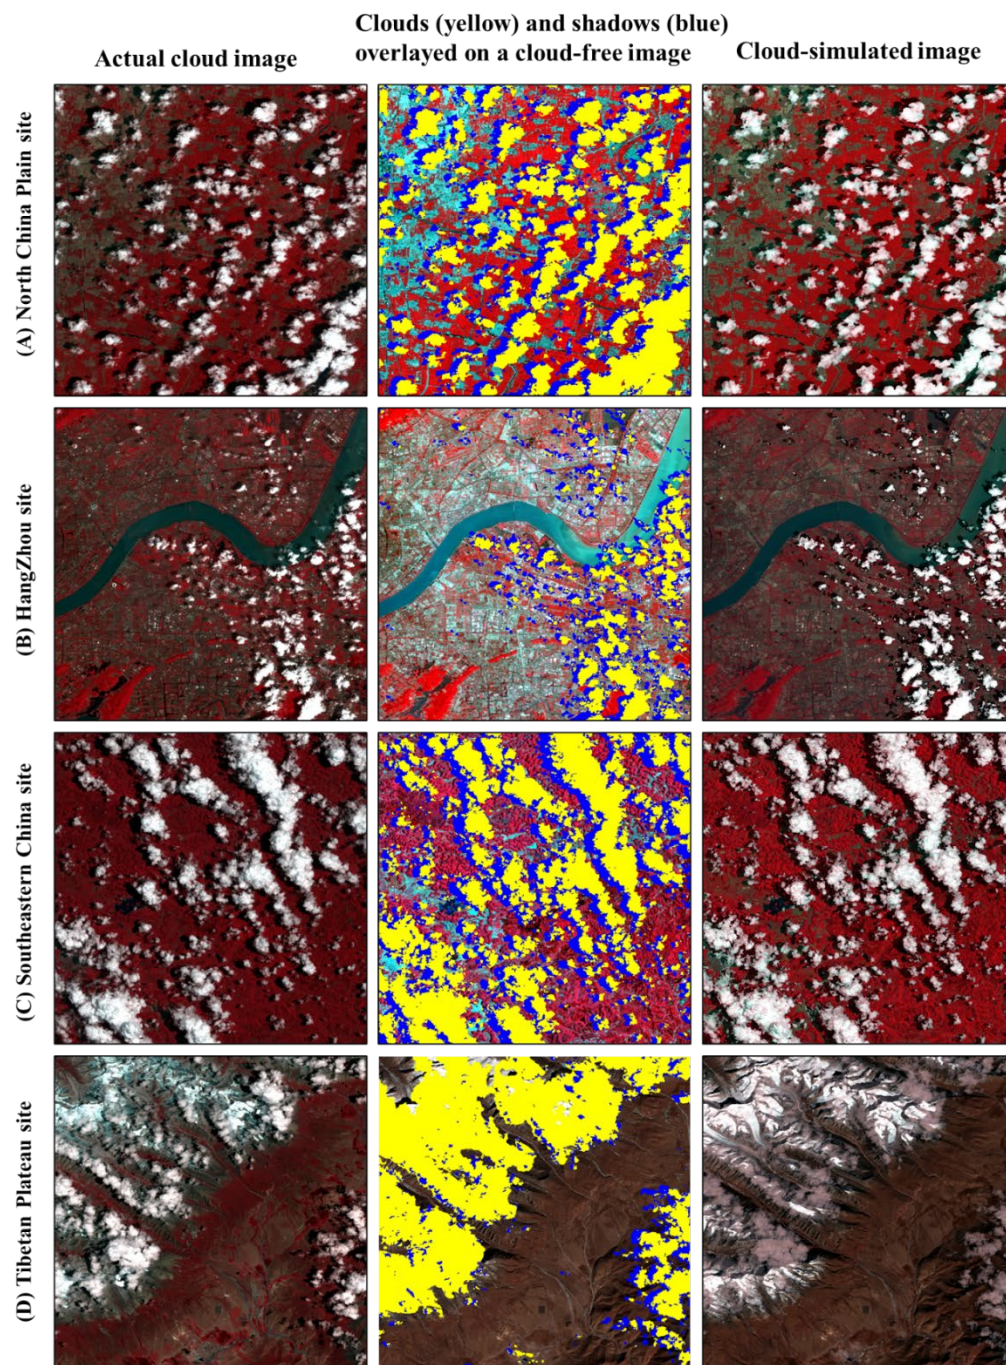

**Figure S1.** The generation of the cloud-simulated images at the four local sites of China. In each row from left to right panels are the actual cloud image, the reference mask of the actual cloud image that was overlapped on a cloud-free image, and the reflectance values of clouds and cloud shadows in (B) that were simulated by MODTRAN (For details, please refer to section 3.1.2).

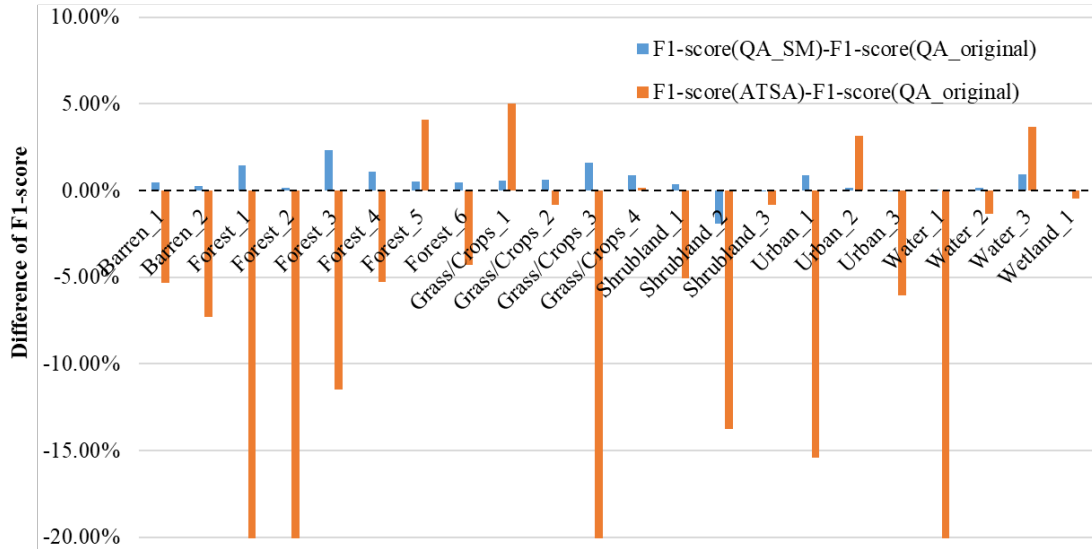

**Figure S2.** The difference of F1-score between QA\_SM and QA\_original (blue color) and between ATSA and QA\_original (orange color) at each L8\_Biome scene. A negative (positive) value suggests worse (better) performance of the method than QA\_original.

**Table S1.** The RMSE and SSIM values for cloud removal at each band in **experiment II** by using different QA bands.

| L8_Biome site              | QA band     | Commission (%) | Omission (%) | F1-Score |
|----------------------------|-------------|----------------|--------------|----------|
| Barren_1<br>CC=64.06%      | QA_original | 0.76%          | 10.19%       | 94.29%   |
|                            | QA_SM       | 0.74%          | 9.35%        | 94.76%   |
|                            | ATSA        | 14.50%         | 4.77%        | 90.10%   |
| Barren_2<br>CC=7.33%       | QA_original | 16.24%         | 16.59%       | 83.60%   |
|                            | QA_SM       | 20.43%         | 9.98%        | 84.47%   |
|                            | ATSA        | 25.03%         | 21.16%       | 76.86%   |
| Forest_1<br>CC=7.09%       | QA_original | 24.86%         | 37.05%       | 68.51%   |
|                            | QA_SM       | 24.39%         | 32.77%       | 71.18%   |
|                            | QA_ATSA     | 31.34%         | 66.98%       | 44.59%   |
| Forest_2<br>CC=5.44%       | QA_original | 32.65%         | 47.23%       | 59.18%   |
|                            | QA_SM       | 32.62%         | 47.47%       | 59.03%   |
|                            | QA_ATSA     | 94.42%         | 18.08%       | 6.86%    |
| Forest_3<br>CC=12.04%      | QA_original | 31.08%         | 15.99%       | 75.72%   |
|                            | QA_SM       | 28.41%         | 10.97%       | 79.36%   |
|                            | QA_ATSA     | 25.71%         | 41.71%       | 65.33%   |
| Forest_4<br>CC=49.59%      | QA_original | 15.87%         | 5.02%        | 89.23%   |
|                            | QA_SM       | 14.77%         | 4.06%        | 90.27%   |
|                            | QA_ATSA     | 7.62%          | 24.04%       | 83.37%   |
| Forest_5<br>CC=53.70%      | QA_original | 31.09%         | 0.40%        | 81.46%   |
|                            | QA_SM       | 30.52%         | 0.09%        | 81.96%   |
|                            | QA_ATSA     | 21.89 %        | 5.48 %       | 85.53%   |
| Forest_6<br>CC=5.05%       | QA_original | 26.93%         | 9.30%        | 80.94%   |
|                            | QA_SM       | 26.19%         | 8.42%        | 81.74%   |
|                            | QA_ATSA     | 7.86%          | 39.97 %      | 72.69%   |
| Grass/Crops_1<br>CC=17.15% | QA_original | 56.68%         | 11.86%       | 58.09%   |
|                            | QA_SM       | 55.58%         | 8.80%        | 59.74%   |
|                            | QA_ATSA     | 68.92%         | 6.99%        | 46.59%   |
| Grass/Crops_2<br>CC=58.97% | QA_original | 2.96%          | 13.93%       | 91.23%   |
|                            | QA_SM       | 2.80%          | 12.64%       | 92.02%   |
|                            | QA_ATSA     | 2.94%          | 14.23%       | 91.07%   |
| Grass/Crops_3<br>CC=32.41% | QA_original | 11.04%         | 13.43%       | 87.75%   |
|                            | QA_SM       | 11.12%         | 10.66%       | 89.11%   |
|                            | QA_ATSA     | 49.07%         | 9.57%        | 65.16%   |
| Grass/Crops_4<br>CC=33.01% | QA_original | 39.03%         | 4.95%        | 74.29%   |
|                            | QA_SM       | 38.31%         | 3.03%        | 75.41%   |
|                            | QA_ATSA     | 35.29%         | 16.05%       | 73.09%   |

|                          |             |         |         |        |
|--------------------------|-------------|---------|---------|--------|
| Shrubland_1<br>CC=6.7%   | QA_original | 54.23%  | 4.11%   | 61.96% |
|                          | QA_SM       | 53.55%  | 3.23%   | 62.77% |
|                          | QA_ATSA     | 59.66%  | 28.42%  | 51.60% |
| Shrubland_2<br>CC=2.65%  | QA_original | 9.87%   | 21.97%  | 83.64% |
|                          | QA_SM       | 19.54%  | 11.50%  | 84.29% |
|                          | QA_ATSA     | 10.90%  | 40.36%  | 71.45% |
| Shrubland_3<br>CC=76.28% | QA_original | 16.84%  | 0.61%   | 90.56% |
|                          | QA_SM       | 16.87%  | 0.54%   | 90.56% |
|                          | QA_ATSA     | 16.90%  | 2.89%   | 89.56% |
| Urban_1<br>CC=3.70%      | QA_original | 46.09%  | 21.11%  | 64.05% |
|                          | QA_SM       | 45.18%  | 18.50%  | 65.55% |
|                          | QA_ATSA     | 33.41%  | 63.37%  | 47.26% |
| Urban_2<br>CC=3.06%      | QA_original | 44.15%  | 6.46%   | 69.94% |
|                          | QA_SM       | 44.00%  | 6.21%   | 70.13% |
|                          | QA_ATSA     | 29.04%  | 39.29%  | 65.43% |
| Urban_3<br>CC=20.29%     | QA_original | 64.49%  | 1.69%   | 52.17% |
|                          | QA_SM       | 64.51%  | 1.40%   | 52.19% |
|                          | QA_ATSA     | 62.23%  | 7.31%   | 53.67% |
| Water_1<br>CC=45.23%     | QA_original | 25.95%  | 20.17%  | 76.83% |
|                          | QA_SM       | 25.74%  | 19.82%  | 77.10% |
|                          | QA_ATSA     | 70.79 % | 51.16 % | 36.55% |
| Water_2<br>CC=6.57%      | QA_original | 48.38%  | 3.81%   | 67.18% |
|                          | QA_SM       | 47.28%  | 4.32%   | 67.98% |
|                          | QA_ATSA     | 49.76%  | 19.66%  | 61.82% |
| Water_3<br>CC=8.23%      | QA_original | 46.16%  | 5.70%   | 68.54% |
|                          | QA_SM       | 45.08%  | 3.78%   | 69.93% |
|                          | QA_ATSA     | 30.55%  | 28.26%  | 70.58% |
| Wetland_1<br>CC=64.93%   | QA_original | 18.62%  | 0.64%   | 89.48% |
|                          | QA_SM       | 18.64%  | 0.35%   | 89.58% |
|                          | QA_ATSA     | 2.78%   | 19.00%  | 88.37% |
